# Supplementary material for: Phosphate-based phosphor for the urban mining of lanthanides: a case study of samarium
Source: Royal Society of Chemistry journal article supplement (doi:10.1039/d4su00026a), 2024-01-01
Supplement: d4su00026a1.pdf [file d4su00026a1.pdf]

## Supporting Information

### **Title: Phosphate-based phosphor for urban mining of lanthanides: a case study of samarium**

*Yonglin Chen, Haoyi Wu\*, and Yihua Hu\**

School of Physics and Optoelectronic Engineering, Guangdong University of Technology, Wai Huan Xi Road, No. 100, Guangzhou 510006, China.

\* Corresponding authors

E-mail: [manofchina@outlook.com](mailto:manofchina@outlook.com), [why@gdut.edu.cn](mailto:why@gdut.edu.cn) (H. Wu), [huyh@gdut.edu.cn](mailto:huyh@gdut.edu.cn) (Y. Hu)

#### **The Supporting information include:**

1. Experimental section
2. Supplementary tables
3. Supplementary Figures

## 1. Experimental Section

### Materials and synthesis of the phosphor.

The  $\text{NaBa}_{1-x}\text{PO}_4: x\text{Sm}^{3+}$  ( $x=0.1, 0.5, 1, 3, 5, 7$  mol%) phosphor was synthesized by conventional solid-state reaction method. The raw materials of  $\text{BaCO}_3$  (Aladdin, 99.99%),  $(\text{NH}_4)\text{H}_2\text{PO}_4$  (Macklin, AR),  $\text{Na}_2\text{CO}_3$  (purity 99.99%) and  $\text{Sm}_2\text{O}_3$  (Aladdin, 99.99%). The starting materials in stoichiometric amounts were mixed thoroughly in a corundum crucible. Firstly, the mixture was heated up to 400 °C and kept at this temperature for 3 h. The powder obtained from pretreatment was ground again and heated at 1200 °C for 3 h under an air atmosphere. Finally, the NBP:  $\text{Sm}^{3+}$  samples were obtained. The phosphor is thoroughly mixed with the epoxy resin 1:1 by weight, and the resulting phosphor-epoxy mixture is coated onto the diode chip (CDX-3WGH40B).

### The $\text{Sm}^{3+}$ recycling.

Typically, 1.0 g of  $\text{Sm}^{3+}$  ion doped NBP at a concentration of 5 mol% is dispersed in 30 mL of distilled water. A small amount of the phosphoric acid was added to adjust the pH to 2~3 and the dispersion became transparent completely (solution A). After adjusting the pH to 9 using 0.1 M NaOH solution, the white precipitation was obtained. The precipitation was collected using centrifugation and drying, and it commixed with a proper amount of sodium carbonate and ammonium biphosphate. The mixture was calcined at 1200 °C for 2 hours and an optical glass sample was obtained after cooling down naturally to room temperature.

### Characterizations of the materials.

Powder X-ray diffractometer operating at 36 kV and 20 mA and equipped with a Cu-K $\alpha$  ( $\lambda = 1.54178 \text{ \AA}$ ) radiation rotating anode for recording the powder X-ray diffraction (XRD) patterns of NaBa<sub>1-x</sub>PO<sub>4</sub>: xSm<sup>3+</sup> (x=0.1, 0.5, 1, 3, 5, 7 mol%) was collected in 10° to 90° range at a scanning step of 0.01° and a scanning rate of 10 °/min. The morphology and elemental distribution of the samples were characterized using a Hithit-S4800 scanning electron microscope (SEM) and an energy dispersive X-ray spectrometer (EDS). The fluorescence spectrophotometer (FLS-980, Edinburgh instruments) with a 450 W Xenon lamp was employed to study excitation, the steady-state fluorescence spectra, including the excitation spectra (PLE), emission spectra (PL), and fluorescence lifetime. The temperature-dependent PL spectrum of the sample within the temperature range of 25-250 °C was determined using an Edinburgh Model FLS 980 spectrofluorometer equipped with a thermal accessory. Ultraviolet-visible diffuse reflection spectra (DRS) were tested by a spectrophotometer (Shimadzu, UV-3600 plus with BaSO<sub>4</sub> white powder as reference). After nitric acid treatment, inductively coupled plasma mass spectrometry (ICP-MS, Agilent 7700s (ICP-MS)) was used to study how many ions were dissolved in the phosphor.

## 2. Supplementary Tables.

**Table S1. A table of abbreviations**

| Acronyms | Full name                                              |
|----------|--------------------------------------------------------|
| wLEDs    | warm light emitting diodes                             |
| NBP      | NaBaPO <sub>4</sub>                                    |
| UV       | ultraviolet                                            |
| ICP-MS   | inductively coupled plasma mass spectrometry           |
| GS       | Sm <sup>3+</sup> was successfully doped into the glass |
| XRD      | X-ray diffraction                                      |
| EDS      | energy dispersive spectroscopy                         |

**Table S2. ICP-MS result of acid treated NBP:Sm<sup>3+</sup>**

| Sample                                                               | Concentration of Sm <sup>3+</sup><br>(mg/L) | Sm <sup>3+</sup> percentage<br>(%) |
|----------------------------------------------------------------------|---------------------------------------------|------------------------------------|
| Original NBP:0.05Sm <sup>3+</sup><br>dispersion with phosphoric acid | 4.172                                       | 100.0                              |
| Residual solution without<br>precipitate                             | 0.101                                       | 2.4                                |

**Table S3. Color coordinates of different Sm<sup>3+</sup> ion concentrations**

| Phosphors                 | CIE coordinates |      | CCT  |
|---------------------------|-----------------|------|------|
|                           | x               | y    |      |
| NBP:0.001Sm <sup>3+</sup> | 0.58            | 0.41 | 1674 |
| NBP:0.005Sm <sup>3+</sup> | 0.60            | 0.40 | 1622 |
| NBP:0.01Sm <sup>3+</sup>  | 0.60            | 0.40 | 1624 |

|                          |      |      |      |
|--------------------------|------|------|------|
| NBP:0.03Sm <sup>3+</sup> | 0.60 | 0.40 | 1623 |
| NBP:0.05Sm <sup>3+</sup> | 0.60 | 0.40 | 1627 |
| NBP:0.07Sm <sup>3+</sup> | 0.60 | 0.40 | 1631 |
| GS                       | 0.61 | 0.39 | 1627 |

### 3. Supplementary Figures.

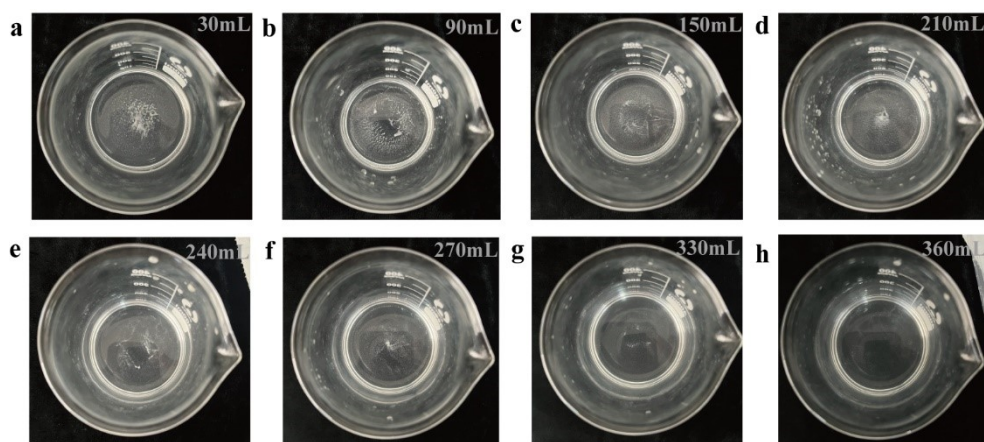

**Fig. S1.** 50 mg NBP sample dissolved in 30 mL (a), 90 mL (b), 150 mL (c), 210 mL (d), 240 mL (e), 270 mL (f), 330 mL (g) and 360 mL (h).

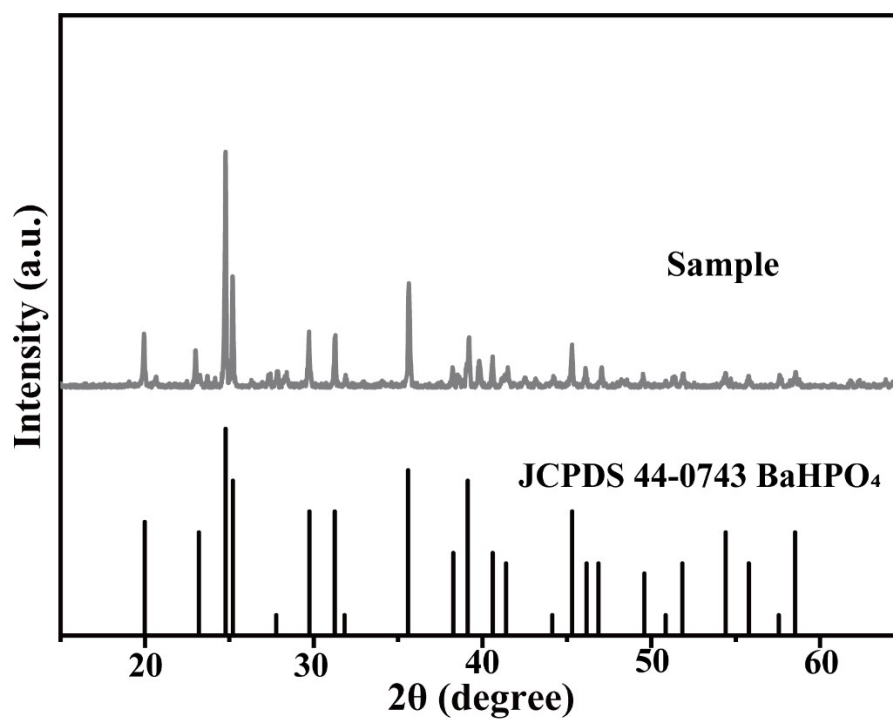

**Fig. S2.** XRD pattern of precipitation in alkalinity range.

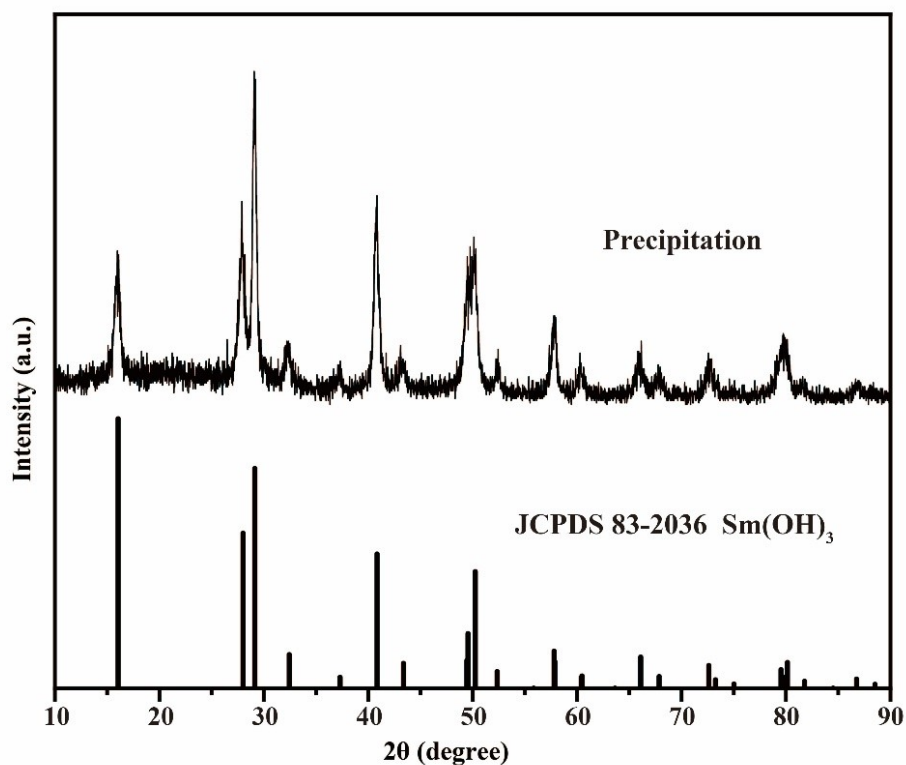

**Fig. S3.** The XRD pattern precipitated in the form of Sm(OH)<sub>3</sub>.

The DRS of NBP host and NBP: xSm<sup>3+</sup> (x=0.1, 0.5, 1, 3, 5, 7 mol%) range (200-800 nm) is presented in **Fig. S4a**. Both the pure host and the doped samples show strong absorption in the UV region (200-300 nm). Before 250 nm, the DRS shows a sharp drop in reflectance mainly due to the charge transfer (CT) from the 2p orbital of O<sup>2-</sup> to 3d<sup>0</sup> orbital of the P<sup>5+</sup> in the PO<sub>4</sub><sup>3-</sup> groups<sup>1</sup>. Obviously, there are six distinct absorption bands between 330-500 nm in the samples doped with Sm<sup>3+</sup> owing to the typical 4f-4f transitions of Sm<sup>3+</sup>. These absorption bands appear at 342, 361, 374, 403, 438, 474 nm as shown in the inset of **Fig. S4a**, originating from <sup>6</sup>H<sub>5/2</sub>→<sup>4</sup>K<sub>17/2</sub>, <sup>4</sup>H<sub>7/2</sub>, <sup>4</sup>P<sub>7/2</sub>, <sup>4</sup>F<sub>7/2</sub>, <sup>4</sup>I<sub>15/2</sub>, and <sup>4</sup>I<sub>13/2</sub> transitions, respectively<sup>1</sup>. In the range of 550-800 nm, the pure NBP exhibits

higher reflectivity. The corresponding band gap can be calculated using Kubelka-Munk(K-M) theory<sup>2</sup> as following:

$$F(R) = \frac{(1 - R)_2}{2R} = \frac{K}{S} \quad (1)$$

where  $F(R)$  is the Kubelka-Munk function,  $R$  is the reflectance,  $K$  is absorption coefficients, and  $S$  is the scattering coefficient. According to the formula proposed by Tauc et al<sup>3</sup>, the associated energy bandgap ( $E_g$ ) of NBP can be calculated by Equation (2):

$$[F(R)hv]^n = A (hv - E_g) \quad (2)$$

where  $A$  is a constant,  $h$  Planck's constant,  $\nu$  the frequency of light,  $h\nu$  incident photon energy. The value of  $n$  is 2 and 1/2 depending on the direct and indirect band gaps of the material, respectively. In this work, the  $n$  value is 2<sup>4</sup>. Using  $[F(R)hv]^2$  and  $h\nu$  as the coordinates to plot, the result is shown in the inset of **Fig. S4b**. Take the intersection of the tangent and the X axis, the optical band gap of NBP can be obtained as 5.73 eV.

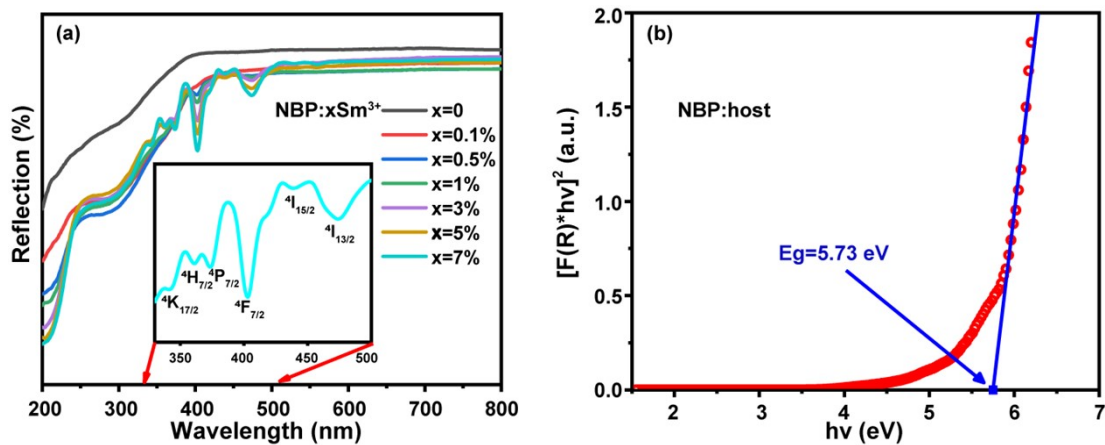

**Fig. S4.** (a) UV-vis diffuse reflection spectra of NBP:  $x\text{Sm}^{3+}$  ( $x=0.1, 0.5, 1, 3, 5, 7$  mol%) (The inset shows reflection curve in the wavelength region from 330 to 500 nm). (b) Absorption spectrum of NBP calculated by the Kubelka-Munk equation.

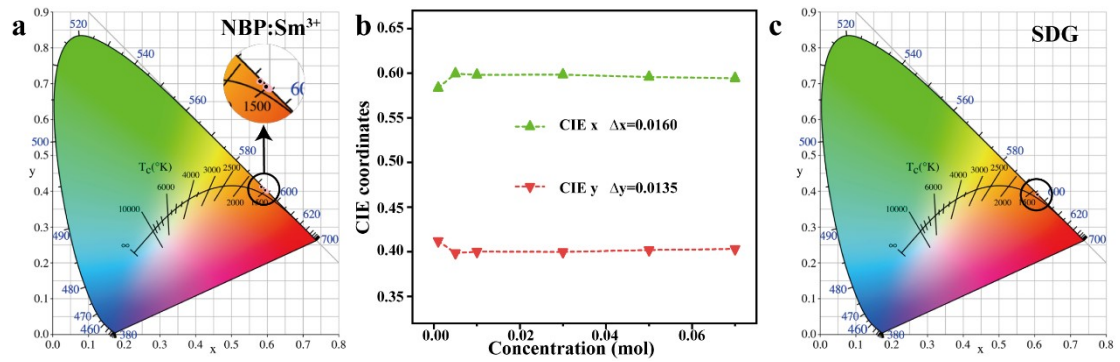

**Fig. S5.** (a) CIE chromaticity diagram of NBP:  $x\text{Sm}^{3+}$  ( $x=0.1, 0.5, 1, 3, 5, 7$  mol%) phosphors. (b) Deviation of the  $x$  and  $y$  of the NBP:  $x\text{Sm}^{3+}$  ( $x=0.1, 0.5, 1, 3, 5, 7$  mol%). (c) CIE chromaticity diagram of GS.

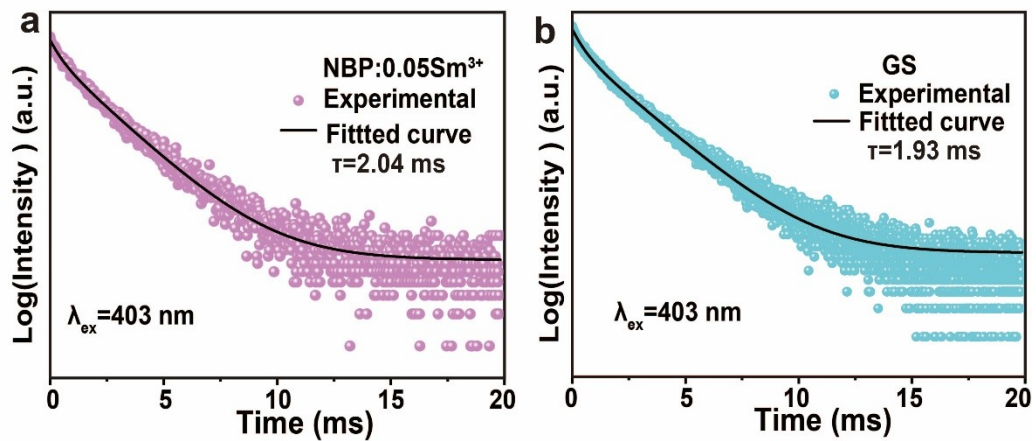

**Fig. S6.** (a) Decay curves of NBP:0.05 $\text{Sm}^{3+}$  (b) Decay curves for the GS.



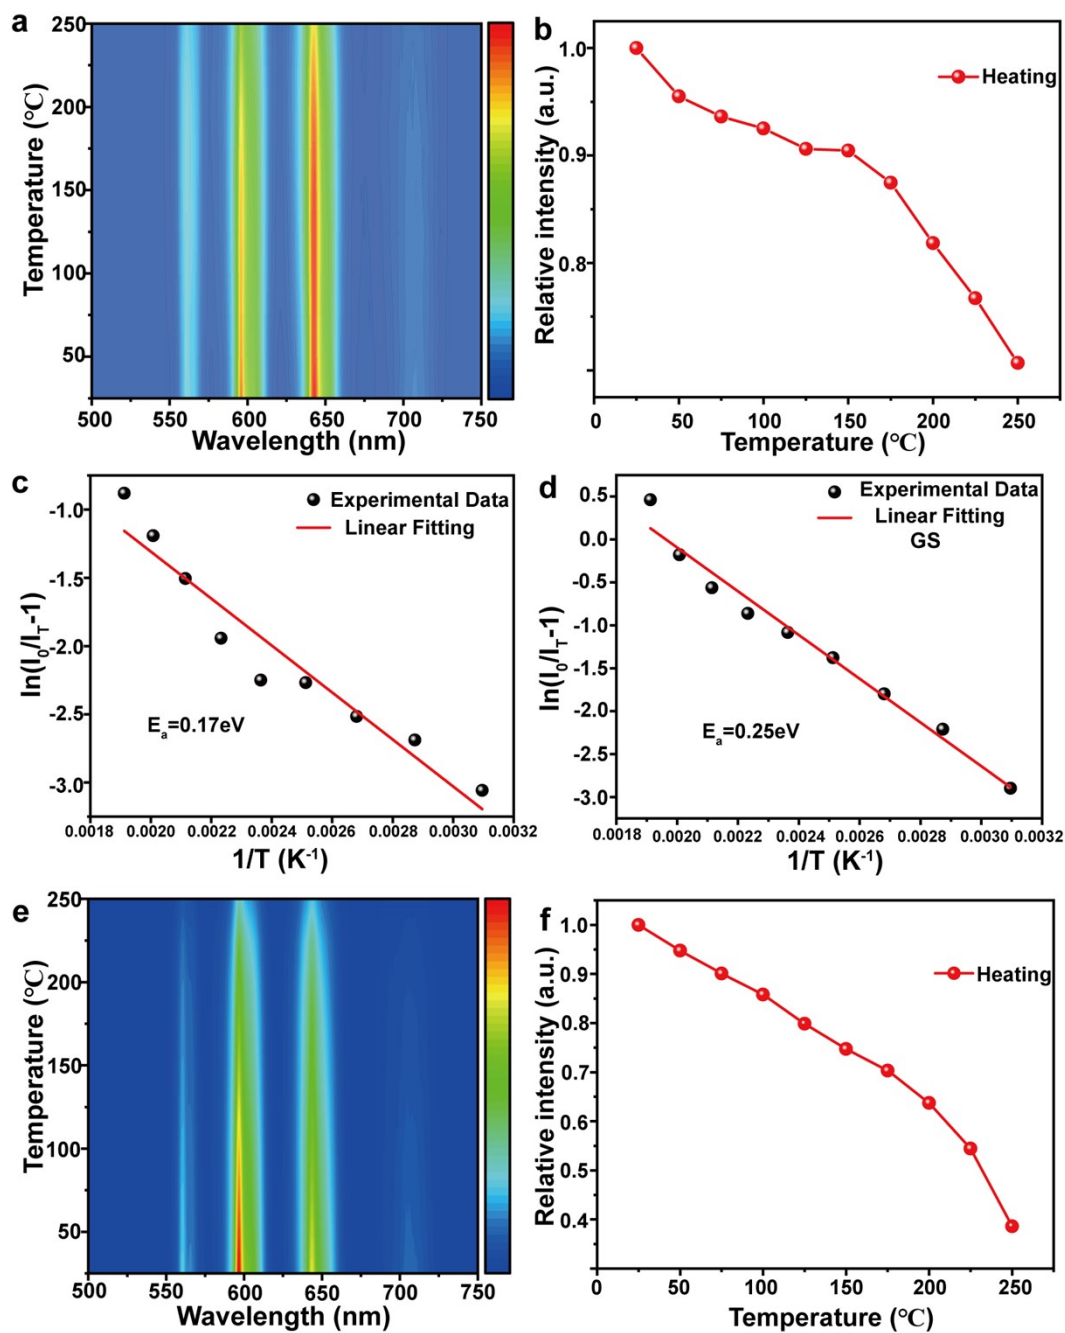

**Fig. S7.** (a) Temperature-dependent PL curves of NBP: 0.01Sm<sup>3+</sup> samples under 403 nm excitation. (b) The temperature dependence of the NBP: 0.01Sm<sup>3+</sup> relative emission intensity. (c) Plot of  $\ln(I_0/I_T - 1)$  versus  $1/kT$  of the NBP: 0.01Sm<sup>3+</sup> phosphor. (d) Plot of  $\ln(I_0/I_T - 1)$  versus  $1/kT$  of the GS samples. (e) Temperature-dependent PL curves of GS samples under 403 nm excitation. (f) Temperature dependence of GS relative emission intensity.

## Notes and references

1. M. K. Pradhan and S. Dash, *J. Rare Earths*, 2022, **40**, 1837-1848.
2. L. Yao, Q. Shao, S. Han, C. Liang, J. He and J. Jiang, *Chem. Mat.*, 2020, **32**, 2430-2439.
3. H. Sun, Q. Zhu and J.-G. Li, *Ceram. Int.*, 2022, **48**, 9640-9650.
4. A. Balakrishna, V. Kumar, A. Kumar and O. M. Ntwaeaborwa, *J. Alloy. Compd.*, 2016, **686**, 533-539.
